# Supplementary material for: Genome-wide analysis of the sox family in the calcareous sponge Sycon ciliatum: multiple genes with unique expression patterns
Source: PubMed Central journal article supplement (PMC3495037; doi:10.1186/2041-9139-3-14), 2012-07-23

Group SoxB

**Group B motif**

| Name     | Start | p-value  | Sites       |             |            |
|----------|-------|----------|-------------|-------------|------------|
| HsaSox14 | 85    | 3.61E-13 | KYRPRRKPKN  | LLKKDRYVFPL | PYLGDTDPLK |
| MmSox14  | 243   | 3.61E-13 | KYRPRRKPKN  | LLKKDRYVFPL | PYLGDTDPLK |
| MmSox2   | 120   | 1.22E-11 | KYRPRRKTKT  | LMKKDKYTLPG | GLLAPGGNSM |
| XlaSox3  | 117   | 8.07E-11 | KYRPRRKTKT  | LLKKDKYSLPG | NLLAPGVSPV |
| AmiSoxB1 | 108   | 8.39E-10 | YRPRRKSRTL  | LKKDNKYTLSM | LGAQGGPPVQ |
| CinSoxB2 | 90    | 1.12E-09 | YRPRRKPKSL  | IKPKDRFAFPL | FPSSGMSSPT |
| AmiSoxBb | 87    | 2.33E-09 | YKPRRRKQKQ  | LIKKATYSFPY | TGTENAAHAA |
| NvSoxB1  | 111   | 4.36E-09 | YRPRRKSRTL  | LKKDNKYALSM | LSAGQAGGQV |
| NvSoxB2  | 104   | 8.89E-08 | SPVFSPPYAAS | MMAVDKFSTNQ | LPQTIAHSVA |
| AmiSoxBa | 104   | 1.29E-07 | GPMFSPYSSP  | MMAVDKFPTNQ | LPQTIAHSTA |
| CinSoxB1 | 174   | 4.38E-07 | YRPRRKTKAI  | LKKENKFGMGP | GGIMGGGAGP |
| SciSoxB  | 199   | 9.30E-07 | NAATIVPAGS  | LQVPVNVFPQ  | ANPPAPGRQV |
| AmqSoxB2 | 249   | 1.21E-06 | DGAKQGGQTI  | LIKMDAGTPHQ | VISPSYITAA |
| AmqSoxB1 | 422   | 1.30E-06 | SSNXTNSAES  | LLDGAGGTLPL | QHLM       |
| LcoSoxB  | 254   | 7.08E-06 | FAYMSTAAKP  | DIPVAQPTFVM | AANPALPAPG |

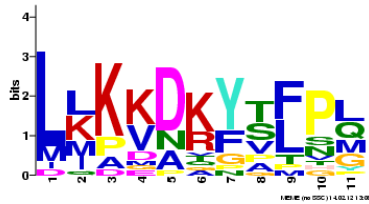

**Conserved region I**

| Name     | Start | p-value  | Sites      |        |             |
|----------|-------|----------|------------|--------|-------------|
| HsaSox14 | 198   | 7.28E-09 | THPSPTNPGY | VVPCNC | TAWSASTLQP  |
| MmSox14  | 356   | 7.28E-09 | THPSPTNPGY | VVPCNC | TAWSASTLQP  |
| AmqSoxB1 | 336   | 2.05E-08 | PVESLDSYSE | VILSNC | KVSDDCSTSIH |
| AmiSoxBa | 151   | 2.79E-07 | FHHSVSPGYP | VIYPNV | TAVNSHHSVT  |
| LcoSoxB  | 297   | 1.47E-06 | GHIEQPQVTY | VILPNK | A           |
| AmqSoxB2 | 317   | 1.72E-06 | QSTPTSSTTP | VIVSEI | KSHSTPQVNS  |
| CinSoxB1 | 21    | 1.91E-06 | QIPYPTSGVP | VIPSNA | HLPPPAPIAG  |
| AmiSoxB1 | 233   | 6.23E-06 | PLSYSQPSNQ | VLIPNI | KQEMPSPGSQ  |
| NvSoxB2  | 150   | 6.67E-06 | FHHSVSPGYP | VIYPSV | SNGGNVHSGS  |
| NvSoxB1  | 241   | 9.08E-06 | ITPPYTQHSP | LILPNI | KQEMPSPTGN  |
| CinSoxB2 | 222   | 1.68E-05 | ATTGANKIKS | VLYPNL | LYTFNETEEK  |
| MmSox2   | 244   | 2.69E-05 | PGMALGSMGS | VVKSEA | SSSPPVVTSS  |
| XlaSox3  | 236   | 8.36E-05 | TVMSLASMGS | VVKSEP | SSPPPAITSH  |
| SciSoxB  | 249   | 1.16E-04 | LYTAAPQYQT | FILPSA | APGQPQAVMA  |
| AmiSoxBb | 173   | 2.40E-04 | ANSVHELPYP | VRPSEM | MIPTPTGPHG  |

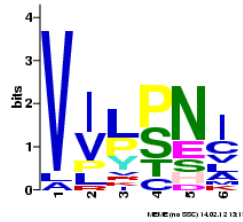

### Conserved region II

| Name            | Start | p-value  | Sites       |                |             |
|-----------------|-------|----------|-------------|----------------|-------------|
| <b>MmSox3</b>   | 396   | 1.91E-18 | PAIASHSQRA  | CLGDLRDMISMYLP | PGGDAADAAS  |
| <b>XlaSox3</b>  | 256   | 1.91E-18 | PAITSHQRA   | CLGDLRDMISMYLP | PGGDASDPSL  |
| <b>MmSox2</b>   | 267   | 2.11E-14 | TSSSHSRAPC  | QAGDLRDMISMYLP | GAEVPEPAAP  |
| <b>NvSoxB1</b>  | 266   | 6.54E-14 | NMNVGGVTRN  | CADQLGDMINTYLP | PADTANPVST  |
| <b>AmiSoxB1</b> | 255   | 1.13E-13 | PGSQSSRGRS  | CTDQLGDMINTYLP | GESAAASANA  |
| <b>AmqSoxB1</b> | 357   | 4.64E-10 | CTSIHSNDSG  | AESDLRNMISTYLE | ESNSXPGPTE  |
| <b>CinSoxB2</b> | 274   | 1.88E-09 | HGSRCEYQRL  | CDEHTRCWLVAFP  | AKPNPINAES  |
| <b>HsaSox14</b> | 97    | 2.11E-08 | KKDRYVFPLP  | YLGDTDPLKAAGLP | VGASDGLLSA  |
| <b>MmSox14</b>  | 255   | 2.11E-08 | KKDRYVFPLP  | YLGDTDPLKAAGLP | VGASDGLLSA  |
| <b>AmiSoxpB</b> | 98    | 3.58E-08 | KVDRYPFITLP | CLPTTDELLKCAPT | GIPITTSFVTD |
| <b>AmqSoxB2</b> | 395   | 1.77E-07 | ALRSAEIPYR  | VYPDLSSMPLCLVP | VVDQASPGSN  |
| <b>LcoSoxB</b>  | 180   | 9.92E-07 | VDVRLQRASA  | SMPNLHSAQTVYQP | AAPIQHHVVP  |
| <b>NvSoxB2</b>  | 213   | 1.15E-06 | LHSQVQQRLS  | QVEDSRGMKSMNAT | PSPPVSSPDP  |
| <b>CinSoxB1</b> | 243   | 4.88E-06 | PSPHAYPAMA  | NSGTAANRYDMYYP | SYSTPTTLPS  |
| <b>AmiSoxBb</b> | 137   | 5.23E-06 | QQYYQMSQHA  | PYPPTYDMAAVHAQ | RQTHSFSTPP  |
| <b>SciSoxB</b>  | 235   | 1.99E-05 | TTQALNGGSS  | SATNLYTAAPQYQT | FILPSAAPGQ  |
| <b>AmiSoxBa</b> | 201   | 2.26E-05 | HNRALYTSQA  | FQPTLPSQIQQRIS | SVDEPRGGSL  |

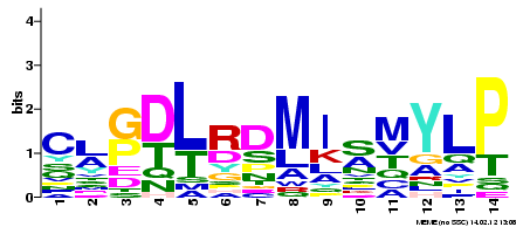

Conserved region

III

| Name     | Start | p-value  | Sites       |                 |            |
|----------|-------|----------|-------------|-----------------|------------|
| XlaSox3  | 149   | 3.74E-17 | SSVGVGQRID  | TYAHMNGWTNGAYSL | MQDQLGYSQH |
| MmSox3   | 263   | 5.57E-16 | SPVGVGQRLD  | TYTHVNGWANGAYSL | VQEQLGYAQP |
| MmSox2   | 160   | 2.59E-12 | LGGGLNQRM   | SYAHMNGWSNGSYSM | MQEQLGYPOH |
| HsaSox14 | 164   | 2.17E-09 | VPHTLATGAL  | PYASTLGYQNGAFGS | LSCPSQHTHT |
| MmSox14  | 322   | 2.17E-09 | VPHTLATSAL  | PYASTLGYQNGAFGS | LSCPSQHTHT |
| NvSoxB2  | 130   | 5.22E-09 | AHSVVALSQDP | MYSKINGGPPFHHSV | SPGYPVIYPS |
| CinSoxB1 | 270   | 5.26E-08 | TP TTLPSMSS | LTSQHNSYAQSAYSV | GGSPAYSVAQ |
| AmiSoxB1 | 138   | 1.49E-07 | QRSMVQNPAD  | HFGQMNGFAYSPITG | YNQMNNDPY  |
| AmqSoxB1 | 394   | 1.70E-07 | PSGSSRPPTA  | EFKLLNASAQCTDFI | ASNSSNXTNS |
| AmiSoxBa | 130   | 2.38E-07 | AHSTALSADP  | MYSKINGAAAFAHHS | VSPGYPVIYP |
| NvSoxB1  | 192   | 7.13E-07 | PPMNGLPFHG  | SYSNMSASAQIYPSV | SVMTSQPVGA |
| LcoSoxB  | 148   | 7.60E-07 | TLARAGSATF  | SFGSTSEWQSNSSSR | TGSTGSQVDV |
| AmiSoxBb | 203   | 9.75E-07 | IYGSTMESGP  | TTSGVSAFTNATQNI | HAQQIAEASP |
| AmqSoxB2 | 157   | 1.17E-06 | PQQVVTSHGL  | HHSPIATTTNFIQSL | QPAASIAGGG |
| CinSoxB2 | 230   | 1.59E-06 | KSVLYPNLLY  | TFNETEEKYETHNFR | RRLPMWITTS |
| SciSoxB  | 151   | 2.89E-06 | TRASSAFNFP  | TAMSASGWTSSGTSL | FSSTTPIGQY |

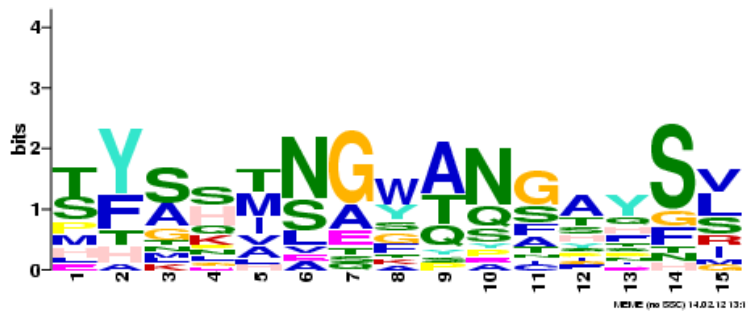

Group SoxC

| Name     | Start | P-value  | Sites      |           |            |
|----------|-------|----------|------------|-----------|------------|
| HsaSox12 | 283   | 1.50E-12 | PDLQPPSGTS | HFEFPDYCT | PEVTEMIAGD |
| AmiSoxC  | 263   | 3.56E-12 | LLDLHGTSAG | QDFPDLYT  | PPEVSELIQG |
| CiSoxC   | 494   | 3.26E-10 | AYADPCRRKS | HFEFSDYDT | DEVKRMIESS |
| AmqSoxC  | 368   | 1.55E-07 | FSPFNIDSCS | TFDFPELPS | DFADIFAQNA |
| SciSoxC  | 554   | 2.26E-07 | EYSCDSNRPL | QFRSPVYYE | SRHTSSMWAP |

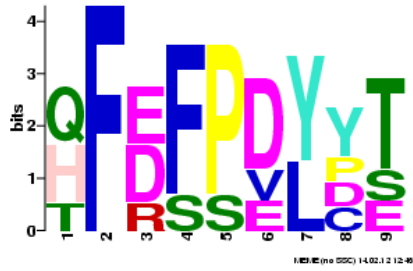

## Group SoxE

### Conserved motif I

| Name     | Start | P-value  | Sites                                       |
|----------|-------|----------|---------------------------------------------|
| HsaSox9  | 75    | 2.56E-27 | EDKFPVCIRE AVSQVLKGYDWTLPMPVVRVN GSSKNKPHVK |
| CinSoxE  | 177   | 3.52E-26 | KDDMSKDIKD AVSQVLKGYDWTLPMPVRMN GSQKTKPHVK  |
| MmSox10  | 74    | 7.28E-26 | DDKFPVCIRE AVSQVLSGYDWTLPMPVVRVN GASKSKPHVK |
| NvSoxE1  | 34    | 3.21E-25 | NHQLSNAIAS AVNHVLDGYDWSLIPLPVRVN GIKTQKPHVK |
| AmiSoxE1 | 29    | 3.21E-25 | NMDLSSAIAT AVNHVLDGYDWSLIPLPVRVN GGHKHKPHVK |
| HsaSox8  | 70    | 1.81E-22 | DERFPACIRD AVSQVLKGYDWSLVPMPVRGG GGGALKAKPH |
| LcoSoxE  | 345   | 1.04E-10 | DPLTKSFKAG EWEHVLAAYVSEKCFSPDIFN TTGFSFSSSA |
| SciSoxE  | 67    | 9.03E-10 | LTTSPRASPA PINNEEEQVDAVQKPKNVRKR KRGGDDRVR  |

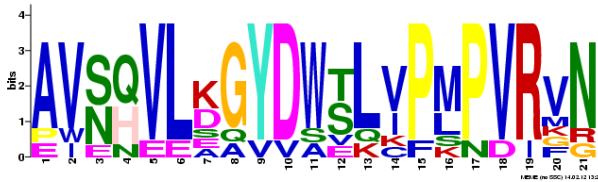

### Conserved motif II

| Name     | Start | P-value  | Sites                                      |
|----------|-------|----------|--------------------------------------------|
| HsaSox9  | 266   | 9.10E-21 | RPLPEGGRQP PIDFRDVDIGELSSDVISNI ETFDVNEFDQ |
| HsaSox8  | 257   | 4.08E-20 | GRRPVDSGRQ NIDFSNVDISELSSEVMGTM DAFDVHEFDQ |
| MmSox10  | 269   | 1.69E-19 | GRSLGEGGKP HIDFGNVDIGEISHEVMSNM ETFDVTELDQ |
| SciSoxE  | 233   | 4.83E-13 | TPSLSACGSV TGGSSDVDVDWLLKDTIQTC KVSPMSLNS  |
| NvSoxE1  | 235   | 2.72E-12 | FPSCSKKDDS NSHAIDFDVGDLTDDLAMG DVDSTEFDQY  |
| CinSoxE  | 155   | 8.99E-11 | SSARSASPGT NDDLSDRDSNPEKDDMSKDI KDAVSQVLKG |
| LcoSoxE  | 176   | 2.14E-09 | EDTERLEEPT AKRFNNTISPALSVDALLQV QGQYPVDLSR |
| AmiSoxE1 | 1     | 6.13E-09 | M TEEATNGEITNTDQRQPKNM DLSSAIATAV          |

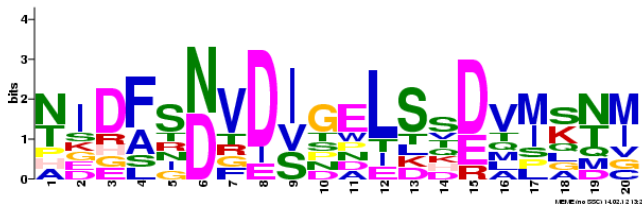

Group SoxF

| Name     | Start | P-value  | Sites                                     |
|----------|-------|----------|-------------------------------------------|
| HsaSox17 | 354   | 1.19E-19 | GTDPSQPAEL LGEVDRTEFEQYLHFVCK PEMGLPYQGH  |
| MmSox17  | 359   | 3.06E-18 | GTESNQPTTEL LGEVDRTEFEQYLPFVYK PEMGLPYQGH |
| XSiSox17 | 324   | 3.53E-16 | RADHIQQVDM LAEVDRTTEFEQYLSYVAK SDLGMHYHGQ |
| SciSoxF1 | 146   | 1.40E-14 | RIKQEEISRV FKLLSQQEITQYVGLAEK KRKTKTPKRS  |
| AmiSoxF  | 346   | 2.29E-14 | SSFHITELIP EEDFNREEFDQYLDGTET ANISWM      |
| LcoSoxF1 | 142   | 2.35E-13 | RIKQEEISRV FKLSQDEITQYVGLASK KRERPPRRKI   |
| NvSoxF1  | 324   | 1.60E-12 | SIPLSDLLLD DLNLNTNELDQYLDGTEL DAFDYVI     |
| LcoSoxF2 | 90    | 2.65E-11 | IDSADQNQRL FGNNITNEDTQGLPLVRS KKLVDQASRI  |
| SciSoxF2 | 248   | 1.10E-10 | RLDSDALNRV TKALTQQEINECVSGCIS PLMKRAPRPS  |
| AmqSoxF  | 26    | 1.03E-09 | RDREGSEVGE EENETRNGFQEEEEVVDK QEEKESKGKK  |
| CinSoxF  | 732   | 1.12E-09 | RKMSVYYDPA TTAENDAEFAKYEGKATA AQESVDIKTA  |

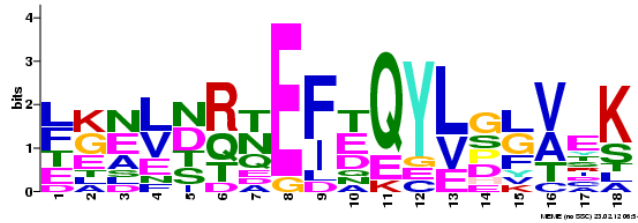

Supplement: 2041-9139-3-14-S4.pdf [file 2041-9139-3-14-S4.pdf]
