# Supplementary material for: Genome-wide analysis of the sox family in the calcareous sponge Sycon ciliatum: multiple genes with unique expression patterns
Source: PubMed Central journal article supplement (PMC3495037; doi:10.1186/2041-9139-3-14), 2012-07-23
Supplement: 2041-9139-3-14-S1.pdf [file 2041-9139-3-14-S1.pdf]

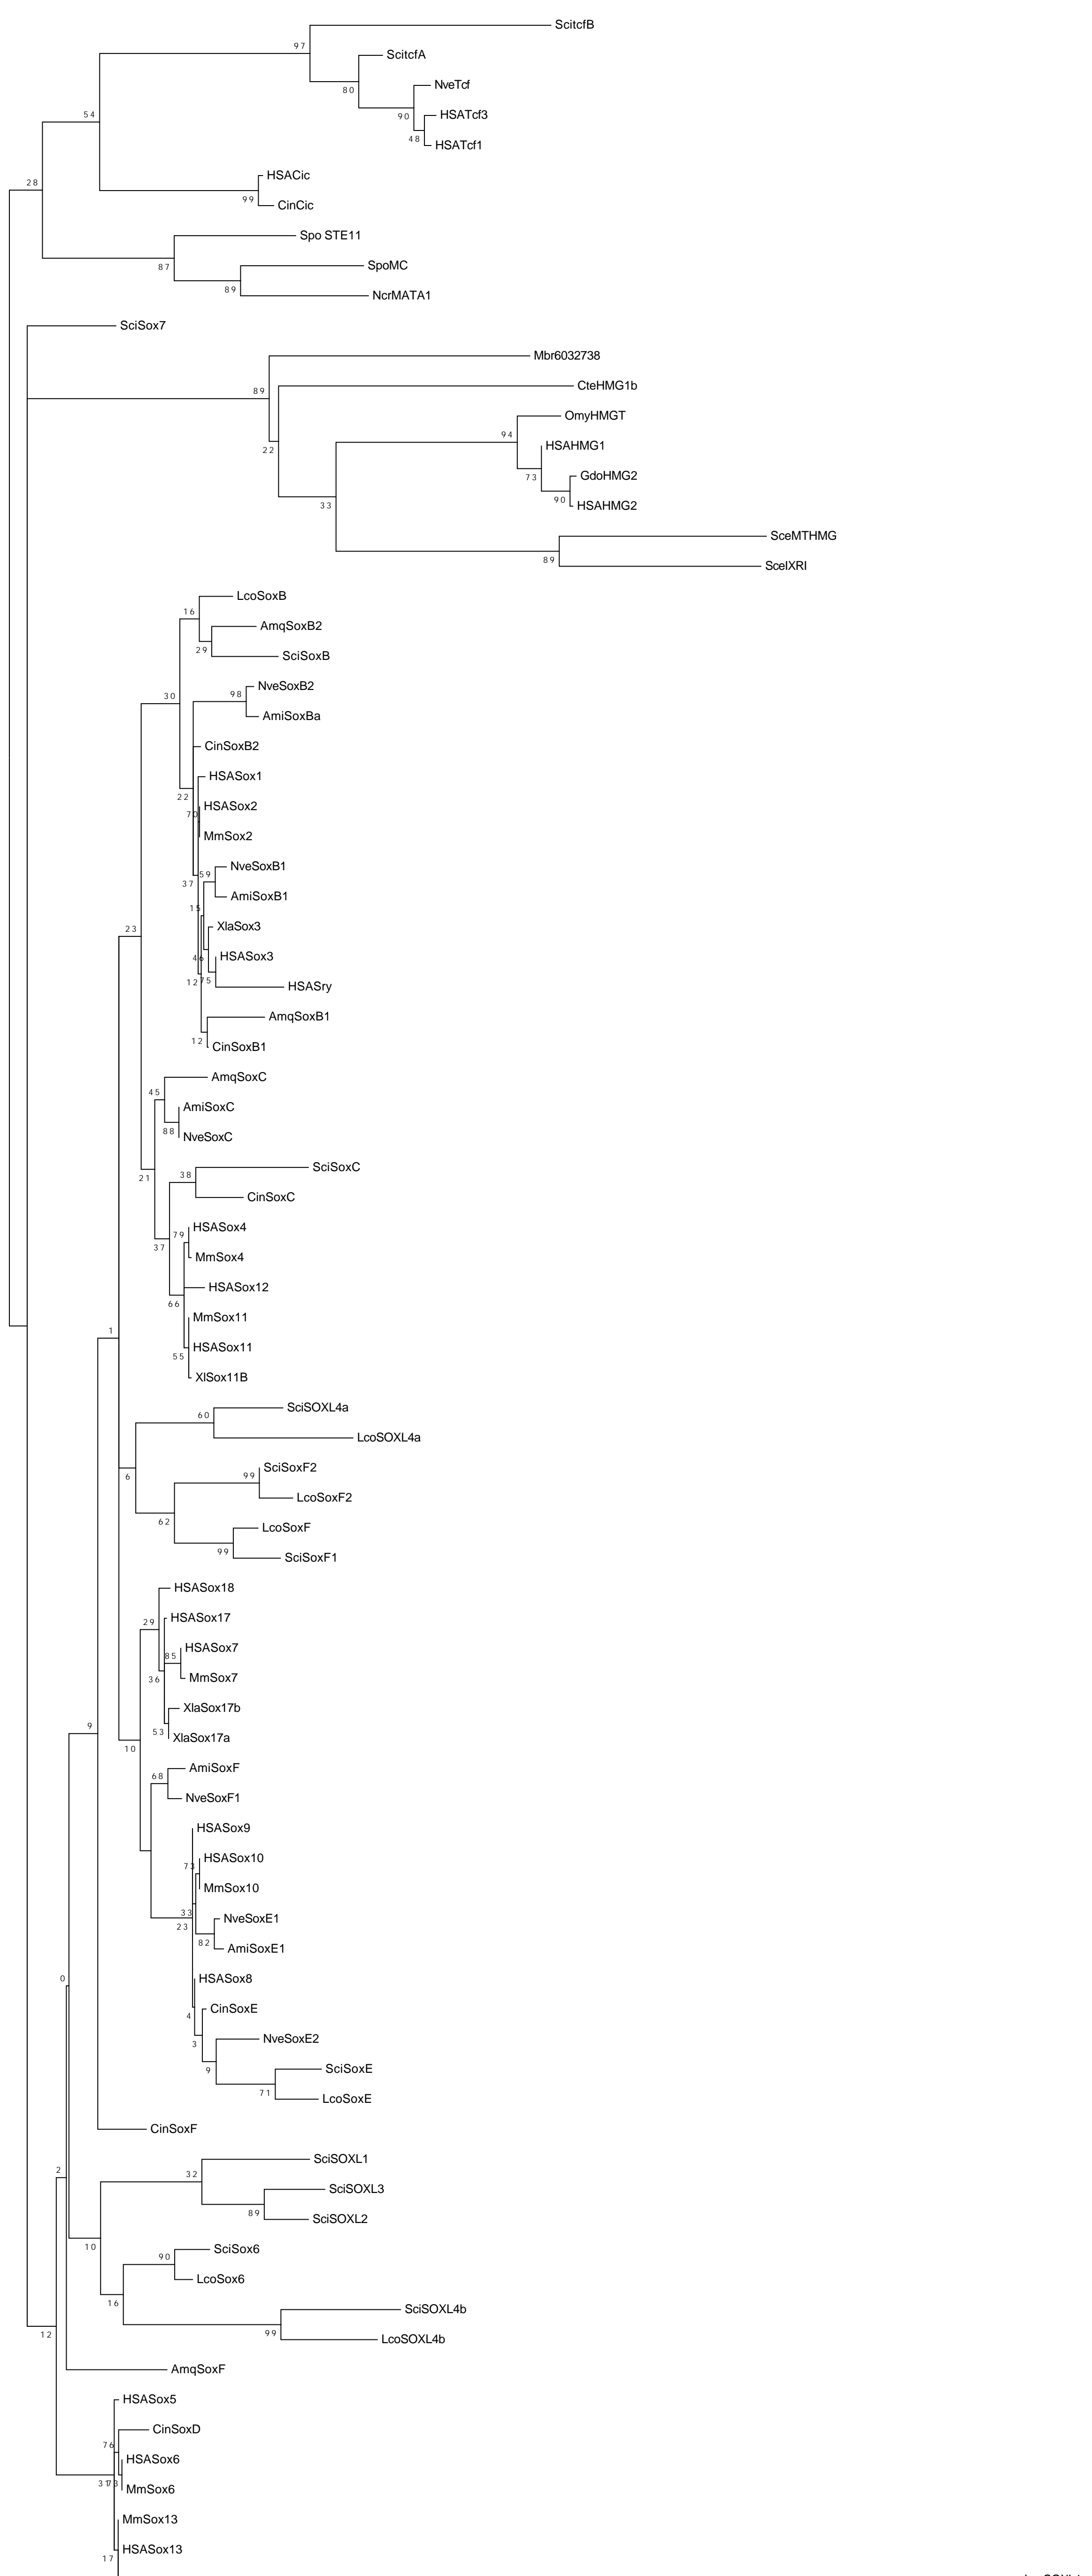

LcoSOXL1

0.2
