# Supplementary material for: Genome-wide analysis of the sox family in the calcareous sponge Sycon ciliatum: multiple genes with unique expression patterns
Source: PubMed Central journal article supplement (PMC3495037; doi:10.1186/2041-9139-3-14), 2012-07-23
Supplement: 2041-9139-3-14-S2.pdf [file 2041-9139-3-14-S2.pdf]

|           | 10         | 20         | 30          | 40         | 50          | 60          | 70          | 80           |
|-----------|------------|------------|-------------|------------|-------------|-------------|-------------|--------------|
| AmiSoxB1  | RVKRPMNAFM | VWSRERRRRM | AQENPK---M  | HNSEISKRLG | AEWKQLSDPE  | KRPYVDEAKR  | LRAVHMKDHP  | DYKY-RPRRK S |
| AmiSoxBa  | HIKRPMAFM  | VWSRGRKQY  | AAINPR---M  | HNSEISKRLG | AEWKMLSDPE  | KEPFVAAEAKR | LQAIHIQEHHP | DYKYKPKRRK P |
| AmiSoxBb  | HIKRPMAFM  | VWSKEKRRIM | SQKNPK---M  | HNSEISKILG | AQWKKMPDEE  | KAKYIEFAKR  | LQOEHSQKHP  | DYKYKPKRRK Q |
| AmiSoxC   | HVKRPMNAFM | VWSQIERRKM | AEHPD---M   | HNAEISKRLG | KRWKILSESE  | KRPFVEESER  | LRIRHMQAYP  | DYKY-RPRKK K |
| AmiSoxE1  | HVKRPMNAFM | VWAQAARRKL | ADQYPH---L  | HNAELSKTLG | KLWKMLKDAE  | KKPFIEEAER  | LRLKHKREHP  | DYKY-QPRRK K |
| AmiSoxF   | RIKRPMAFM  | VWAQVERRRL | ADANPE---L  | HNAELSKILG | QAWRALNGLQ  | KRPFVEEAER  | LRQOHKIDHP  | DYKY-RPRRK K |
| AquSoxB1  | KVKRPMNAFM | VWSRKMRRKI | ADENPK---M  | HNSEISKRLG | TQWKALSEED  | KRPFIDEAKR  | LREAHMKKHP  | NYKY-KPKRK K |
| AquSoxB2  | HIKRPMAFM  | VWSKERKEL  | AQENPR---M  | HNSELSKKG  | AEWKALSDTN  | KHRYIEEAKK  | IREQHMAEFP  | HYRY-RPRRK P |
| AquSoxF   | RIKRPMAFM  | VWSSLERKKL | AEKEPN---L  | HNTELSKRLG | QMWKEMTEED  | KTPYRQEAIR  | LKDKLMEHP   | EYKY-KPKRR K |
| AquSoxC   | HIKRPMAFM  | VWAQLERRKM | TTEFPD---M  | HNAEISRRLG | KLWRLLSDRE  | KOPYIEESER  | LRIQHMKOYP  | DYKY-RPRKK G |
| SciSoxB   | HVKRPMNAFM | VWSREERKQF | AQENPK---M  | HNSEISTKLG | EKWKRLTEEE  | RAPYVDKARS  | IRTEHMKKFP  | DYKY-RPKRK P |
| SciSoxC   | HVKRPMNAFM | VWSSLERKER | MAKNPK---L  | HNAEISKDLG | RVWKSKEDE   | KKPFYDMAKR  | EKTEHQAKYP  | DYKY-RPKKK P |
| SciSoxE   | RVRRPMNAFM | VWSKDARKEL | AKQDPS---V  | HNADLSKKG  | ELWKIMSEEE  | KRPYVEKSES  | LRAIHRREHP  | DYKY-QPRKP R |
| SciSoxF1  | RVKRPMNPFM | VWAQOERPRL | SAIHG---I   | HNAELSRLLG | QNWNKMDSE   | KOPYKAEAIR  | IAELHRLQHP  | DYKY-KPRKK D |
| SciSoxF2  | RIKRPMPFM  | IWAKGERSTI | LNRNPT---M  | HNSDVSRLG  | RNWRSMSDEE  | KOPFIRAAEQ  | LAEEHRRKHP  | DYKY-RPRKK D |
| SciSox6   | HVKRPMNAFM | VWAKTERRKL | AMKLPG---I  | PNSEVSKLLG | DMWRSLTDEE  | KDKYRGQSEK  | IRVQHKKDNP  | GYRY-HPNRP R |
| SciSox7   | RIKRPMAFM  | LEALEERKVI | ARNHPN---M  | HNSEISKQLG | KKWKSKEHEE  | QAPYREAAGE  | IRREHQKHP   | DYQF-KPNRK K |
| SciSoxL1  | KLKRPMSAFL | IWARTERRRL | HNIVPK---M  | PNSEISKLLG | QKWRIMPEAL  | KAPYHEQAAK  | ACDEYRANP   | KRRR-RQPRQ Q |
| SciSoxL2  | LAKRPMNAFM | LWARTERRRL | FAGMPDGGKL  | RNSEVSKILG | KKWRSEMSSQE | KAPYHGLASR  | ACQYRFLNA   | HQKR-RQRTI K |
| SciSoxL3  | FVKRPMNAFM | LWAKGERPRI | FASLRGDQHL  | SNSDVSILG  | KTWREMSTEE  | KAPFHRQASR  | ACQYRFVNP   | KQKR-KRKRK P |
| SciSoxL4a | RIKRPMTFL  | MWAKEARKRV | SDEHAD---L  | DNAAISGLLG | QLWKELPDSQ  | KEPFILRADD  | VRQHRHDHP   | SY-Y-RHRQR K |
| SciSoxL4b | KNKRPINAFL | LWAQSSRPKL | AKKFG---L   | SNWQISMVLG | ELWQOAPVES  | KCGYHKLAEQ  | LRNEHRASNP  | EYLY-HPERL A |
| LcoSoxB   | HIKRPMAFM  | VWSRDKRREL | ATQNP---M   | HNSEISVRLG | DEWKSIAEQD  | KAPFIEEARR  | LRAQHQADHP  | DYKY-RPRRK P |
| LcoSoxE   | RVRRPMNAFM | VWAKKARKEL | AEKNPS---V  | HNAELSKTLG | AMWRDMPEEE  | KRPYLDQAEA  | IRQAHROLHP  | DYKY-QPRKR K |
| LcoSoxF1  | RIKRPMPFM  | VWAQOERPHL | SAANPG---I  | HNAELSRLLG | QHWNRLSELQ  | KLPFRLEAEK  | LAERHRLDHP  | EYKY-RPRKK D |
| LcoSoxF2  | RIKRPMPFM  | IWAKGERSTI | LTQNP---M   | HNSDVSRLG  | RNWRGMSLEE  | KRPYILAAEH  | LAEEHRRLHP  | NYKY-RPRKK D |
| LcoSox6   | HVKRPMNAFM | VWAKTERRQL | AMRLPG---M  | PNSEVSKILG | DMWRRLPDEQ  | KEQYRSESEK  | IRRKHKAHP   | DYRY-HPKRP R |
| LcoSoxL1  | KPKRPMNAFL | TWARTERRRL | HGLLPG---RM | PNSEISKILG | QKWKIMPESL  | KAPYEQAAH   | ASDEYHSANP  | RRRR-RRCHK - |
| LcoSoxL4a | HTKRPMAFL  | LWTKEHRKHV | SDSNPD---M  | CNADVSTTLG | RMWRSLPMGD  | KOPYLKMAEG  | IRHKHRTDNP  | GY-Y-RHCPRT  |
| LcoSoxL4b | KRSRPINCF  | LWSKWARPKL | AKRFDP---S  | PNWEISMLLG | EVWKLKPKKD  | KGOYHKNAEI  | LRQEHRSHP   | DLYK-QRHSR R |
